# Supplementary material
Source: Springer Nature journal article supplement (https://www.springermedizin.de/resource/supplementary/12958_2008_473_MOESM2_ESM.pdf/9567998)
Supplement: MOESM2 [file 9567998]

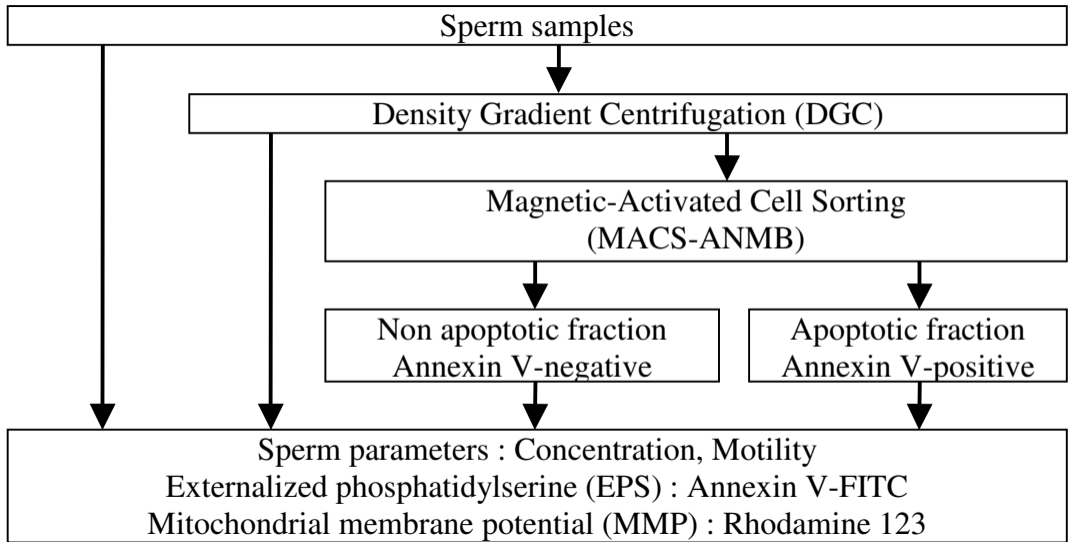

Sperm samples

Density Gradient Centrifugation (DGC)

Magnetic-Activated Cell Sorting  
(MACS-ANMB)

Non apoptotic fraction  
Annexin V-negative

Apoptotic fraction  
Annexin V-positive

Sperm parameters : Concentration, Motility  
Externalized phosphatidylserine (EPS) : Annexin V-FITC  
Mitochondrial membrane potential (MMP) : Rhodamine 123
